# Supplementary material
Source: MDPI journal article supplement (https://www.mdpi.com/2073-4441/13/22/3239)
Supplement: s1 [file s1]

## Article

# Dynamic Assessment of the Flood Risk at Basin Scale under Simulation of Land-Use Scenarios and Spatialization Technology of Factor

Jun Liu <sup>1</sup>, Jiyan Wang <sup>1</sup>, Junnan Xiong <sup>1,2,\*</sup>, Weiming Cheng <sup>2</sup>, Xingjie Cui <sup>1</sup>, Wen He <sup>1</sup>, Yufeng He <sup>1</sup>, Yu Duan <sup>1</sup>, Gang Yang <sup>1</sup> and Nan Wang <sup>3</sup>

<sup>1</sup> School of Civil Engineering and Geomatics, Southwest Petroleum University, Chengdu 610500, China; 201922000655@stu.swpu.edu.cn (J.L.); wangjiyan@swpu.edu.cn (J.W.); 202022000943@stu.swpu.edu.cn (X.C.); 201922000663@stu.swpu.edu.cn (W.H.); 201922000656@stu.swpu.edu.cn (Y.H.); 201922000658@stu.swpu.edu.cn (Y.D.); 201922000664@stu.swpu.edu.cn (G.Y.)

<sup>2</sup> State Key Laboratory of Resources and Environmental Information System, Institute of Geographic Sciences and Natural Resources Research, CAS, Beijing 100101, China; chengwm@lreis.ac.cn

<sup>3</sup> School of Geographical Sciences, Northeast Normal University, Changchun, 130024, China; wangn236@nenu.edu.cn

\* Correspondence: xiongjn@swpu.edu.cn

## Supplementary Figures

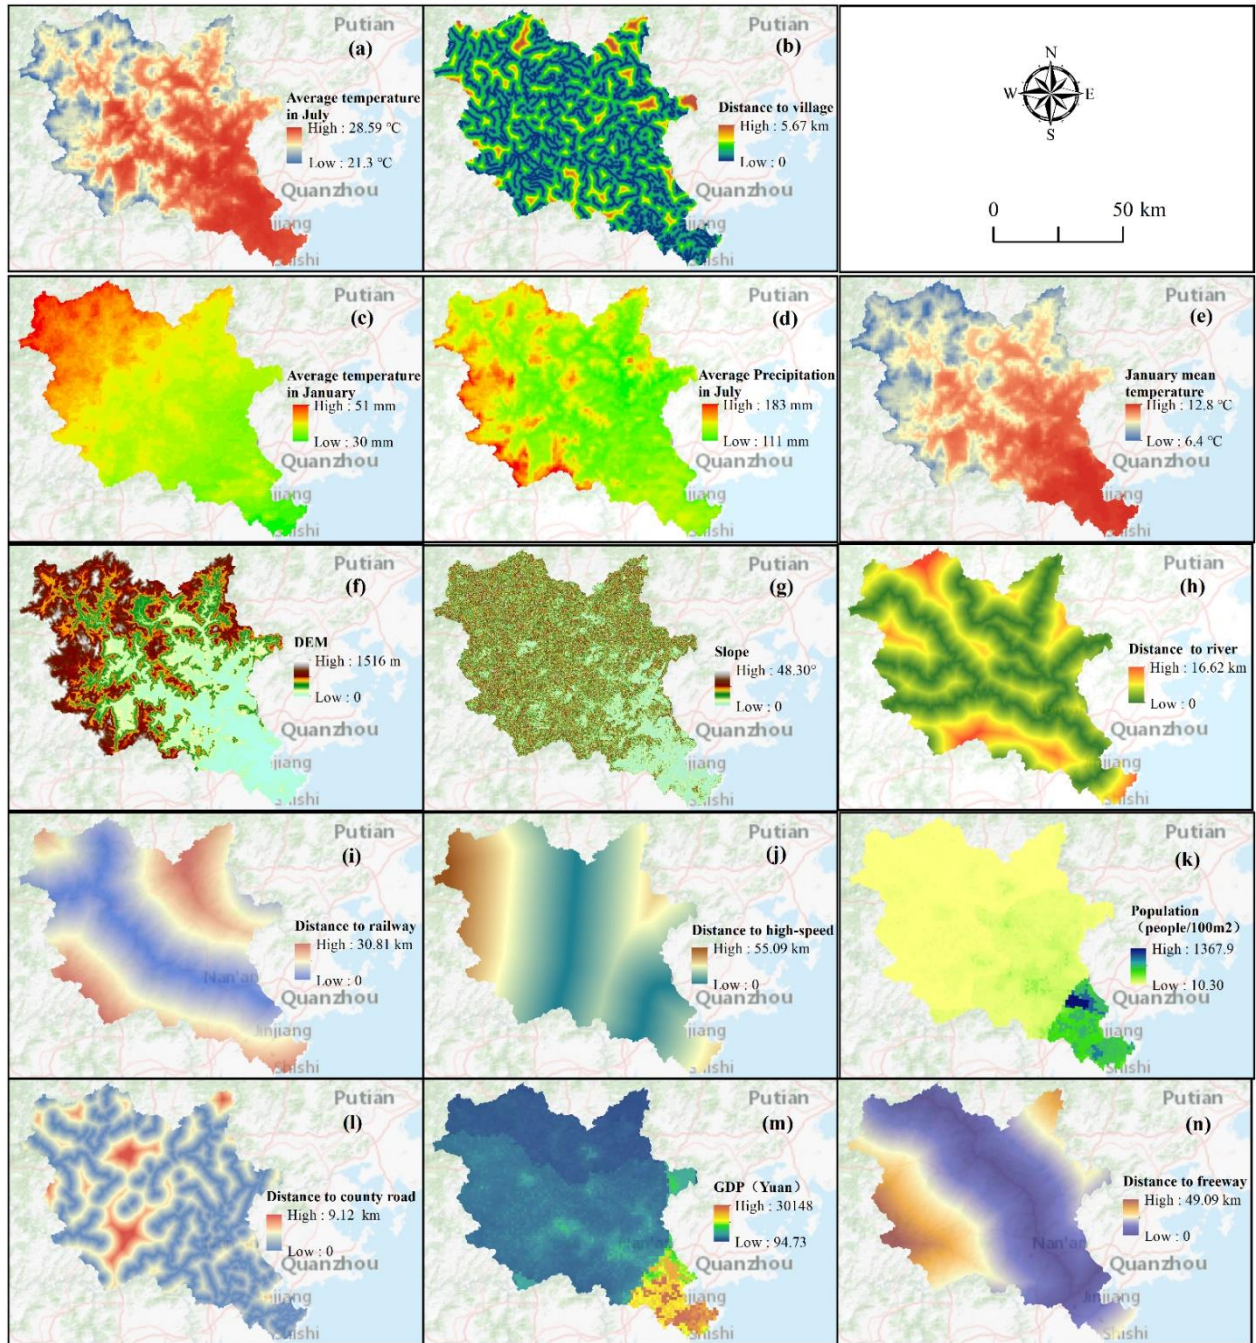

**Figure S1.** The driving factors of land-use changes. Subfigures a and b are the average temperature in July and distance to village respectively; Subfigures c–e are average temperature in January, average precipitation in July and January mean temperature respectively; Subfigures f–h are DEM, slope, and distance to river respectively; Subfigures i–k are distance to railway, distance to high-speed, and Population respectively; Subfigures l–n are distance to county road, GDP, and distance to freeway.

## Supplementary Tables

**Table S1.** The overview of data used in the future land-use simulation.

| Factor types          | factors                          | Years     | Resolution  | Sources                                                            |
|-----------------------|----------------------------------|-----------|-------------|--------------------------------------------------------------------|
| Natural environment   | DEM                              | 2010      | 30m         | Geospatial Data Cloud (www.gscloud.cn) (accessed on: 6 May 2021)   |
|                       | Slope                            |           |             |                                                                    |
|                       | Distance to river                | 2010      | 1:1,000,000 | National Flash Flood Investigation and Evaluation Project (NFFIEP) |
|                       | Average temperature in January   | 1970-2020 | 30s         |                                                                    |
|                       | Average temperature in July      |           |             |                                                                    |
|                       | Average precipitation in January |           |             |                                                                    |
|                       | Average precipitation in July    |           |             |                                                                    |
| Social economy        | Population                       | 2010      | 1km         | Geospatial Data Cloud (www.gscloud.cn) (accessed: 30 May 2021)     |
|                       | GDP                              |           |             |                                                                    |
| Geographical location | Distance to county road          | 2015      | 1:1,000,000 | National Flash Flood Investigation and Evaluation Project (NFFIEP) |
|                       | Distance to freeway              |           |             |                                                                    |
|                       | Distance to railway              |           |             |                                                                    |
|                       | Distance to high-speed rail      |           |             |                                                                    |
|                       | Distance to village              |           |             |                                                                    |

**Table S2.** Parameters of disaster-inducing factors, disaster-breeding environments, and hazard-bearing bodies in the triangular fuzzy number-based AHP (TFN-AHP).

| Matrix A                       | Disaster-inducing factors | Disaster-breeding environments | Hazard-bearing bodies |
|--------------------------------|---------------------------|--------------------------------|-----------------------|
| Disaster-inducing factors      | 1                         | 1/4,1/2,1                      | 1/3,1/2,1             |
| Disaster-breeding environments | 1,2,4                     | 1                              | 1/1.5,1/1.25,1        |
| Hazard-bearing bodies          | 1,2,3                     | 1,1.25,1.5                     | 1                     |

**Table S3.** Parameters of disaster-inducing factors in the triangular fuzzy number-based AHP (TFN-AHP).

| Disaster-inducing factors | M3DP        | BYD     |
|---------------------------|-------------|---------|
| M3DP                      | 1           | 1,1.5,2 |
| BYD                       | 1/2,1/1.5,1 | 1       |

**Table S4.** Parameters of disaster-breeding environments in the triangular fuzzy number-based AHP (TFN-AHP).

| Disaster-breeding environments | RC          | DEM         | SL          | DR          | TWI     |
|--------------------------------|-------------|-------------|-------------|-------------|---------|
| RC                             | 1           | 1.5,1/1.2,1 | 1.5,1/1.2,1 | 1           | 1,1.5,2 |
| DEM                            | 1, 1.2, 1.5 | 1           | 1           | 1           | 1,1.5,3 |
| SL                             | 1, 1.2, 1.5 | 1           | 1           | 1           | 1,1.5,3 |
| DR                             | 1           | 1           | 1           | 1           | 1,1.5,2 |
| TWI                            | 1/2,1/1.5,1 | 1/3,1/1.5,1 | 1/3,1/1.5,1 | 1/2,1/1.5,1 | 1       |

**Table S5.** Parameters of hazard-bearing bodies in the triangular fuzzy number-based AHP (TFN-AHP).

| Hazard-bearing bodies | GDP | POP |
|-----------------------|-----|-----|
|-----------------------|-----|-----|

|     |             |                 |
|-----|-------------|-----------------|
| GDP | 1.00        | 1/1.5, 1/1.1, 1 |
| POP | 1, 1.1, 1.5 | 1.00            |

**Table S6.** The weights of each factor determined by triangular fuzzy number-based AHP (TFN-AHP).

| M3DP | BYD  | RC   | DEM  | SL   | DR   | TWI  | GDR  | POP  |
|------|------|------|------|------|------|------|------|------|
| 0.13 | 0.07 | 0.08 | 0.10 | 0.10 | 0.09 | 0.03 | 0.17 | 0.25 |

**Table S7.** The weights of each factor determined by Criteria Importance Through Intercriteria Correlation (CRITIC).

| Years | Scenar-<br>ios | M3DP | BYD  | DEM  | SL   | DR   | TWI  | RC   | GDR  | POP  |
|-------|----------------|------|------|------|------|------|------|------|------|------|
| 2020  | \              | 0.14 | 0.12 | 0.10 | 0.10 | 0.15 | 0.07 | 0.18 | 0.10 | 0.04 |
|       | NG             | 0.14 | 0.12 | 0.10 | 0.10 | 0.15 | 0.07 | 0.18 | 0.10 | 0.04 |
| 2030  | EP             | 0.14 | 0.12 | 0.10 | 0.10 | 0.15 | 0.07 | 0.18 | 0.10 | 0.04 |
|       | CP             | 0.15 | 0.12 | 0.11 | 0.10 | 0.15 | 0.07 | 0.18 | 0.09 | 0.03 |
|       | NG             | 0.14 | 0.12 | 0.10 | 0.10 | 0.15 | 0.07 | 0.19 | 0.10 | 0.03 |
| 2050  | EP             | 0.15 | 0.12 | 0.11 | 0.10 | 0.15 | 0.07 | 0.18 | 0.09 | 0.03 |
|       | CP             | 0.15 | 0.12 | 0.11 | 0.10 | 0.15 | 0.07 | 0.18 | 0.09 | 0.03 |

NG, EP and CP scenarios represent natural growth scenario, and ecological protection scenario, and cropland protection scenario, respectively.
